# Supplementary material for: Safer salts for CdTe nanocrystal solution processed solar cells: the dual roles of ligand exchange and grain growth
Source: Royal Society of Chemistry journal article supplement (doi:10.1039/c5ta02488a), 2015-01-01
Supplement: c5ta02488a1.pdf [file c5ta02488a1.pdf]

## Supplementary Information

### Safer Salts for CdTe Nanocrystal Solution Processed Solar Cells: *The Dual Roles of Ligand Exchange and Grain Growth*

Troy K. Townsend,<sup>a†</sup> William B. Heuer,<sup>b</sup> Edward E. Foos,<sup>c</sup> Eric Kowalski,<sup>d</sup> Woojun Yoon<sup>e</sup> and Joseph G. Tischler<sup>e</sup>

<sup>a</sup>St. Mary's College of Maryland, Department of Chemistry and Biochemistry, St. Mary's City, MD 20686

<sup>b</sup>U.S. Naval Academy, Department of Chemistry, Annapolis, MD 21402

<sup>c</sup>NSWC Indian Head EOD Technology Division, Indian Head, MD 20640

<sup>d</sup>ASEE NREIP Intern at the U.S. Naval Research Laboratory, Washington, DC

<sup>e</sup>Naval Research Laboratory, Washington, DC 20375

† Corresponding Author: [tktownsend@smcm.edu](mailto:tktownsend@smcm.edu)

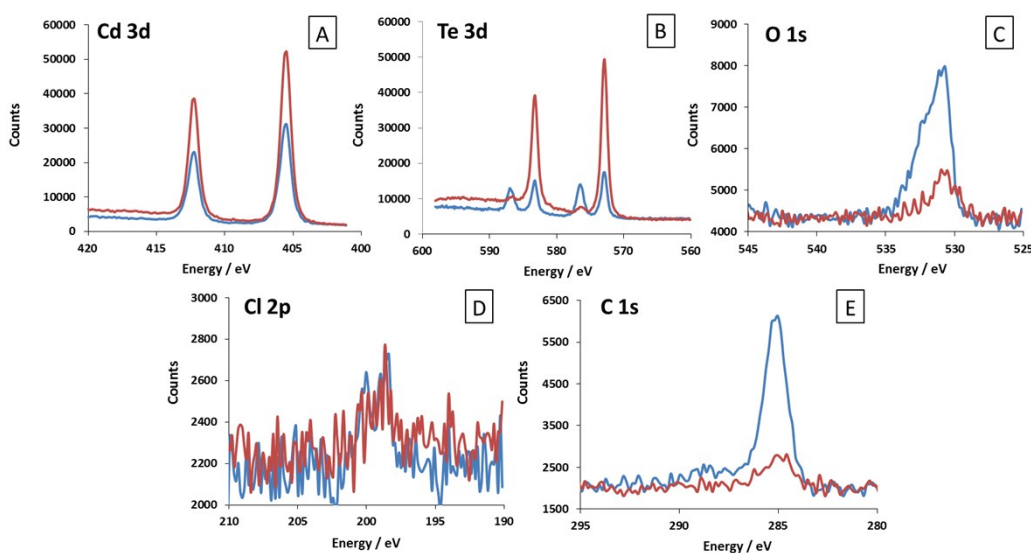

Figure S1. Fig. 5 X-ray photoelectron spectra (XPS) of solution processed CdTe nanocrystal working device film treated with CdCl<sub>2</sub> in methanol and annealed at 380°C for 25s per layer for 7 layers @ 60 nm each detecting the surface (blue) and sub-surface (red) presence of cadmium [A], tellurium [B], oxygen [C], chlorine [D] and carbon [E].

Table S1. Relative atomic compositions of surface and sub-surface annealed CdTe nanocrystal films from Figure S1 XPS data.

| Element | Surface | Bulk  |
|---------|---------|-------|
| Cd      | 12.99   | 32.76 |
| Te      | 8.27    | 29.67 |
| O       | 28.42   | 16.9  |
| C       | 50.31   | 20.66 |
